# Supplementary material
Source: HighWire-hosted journal article supplement (https://bmjopen.bmj.com/content/7/2/e013879)
Supplement: inline-supplementary-material-2 [file inline-supplementary-material-2.pdf]

## Supplementary File 2

### Time-course graphs of the nine target genes not presented in the main manuscript

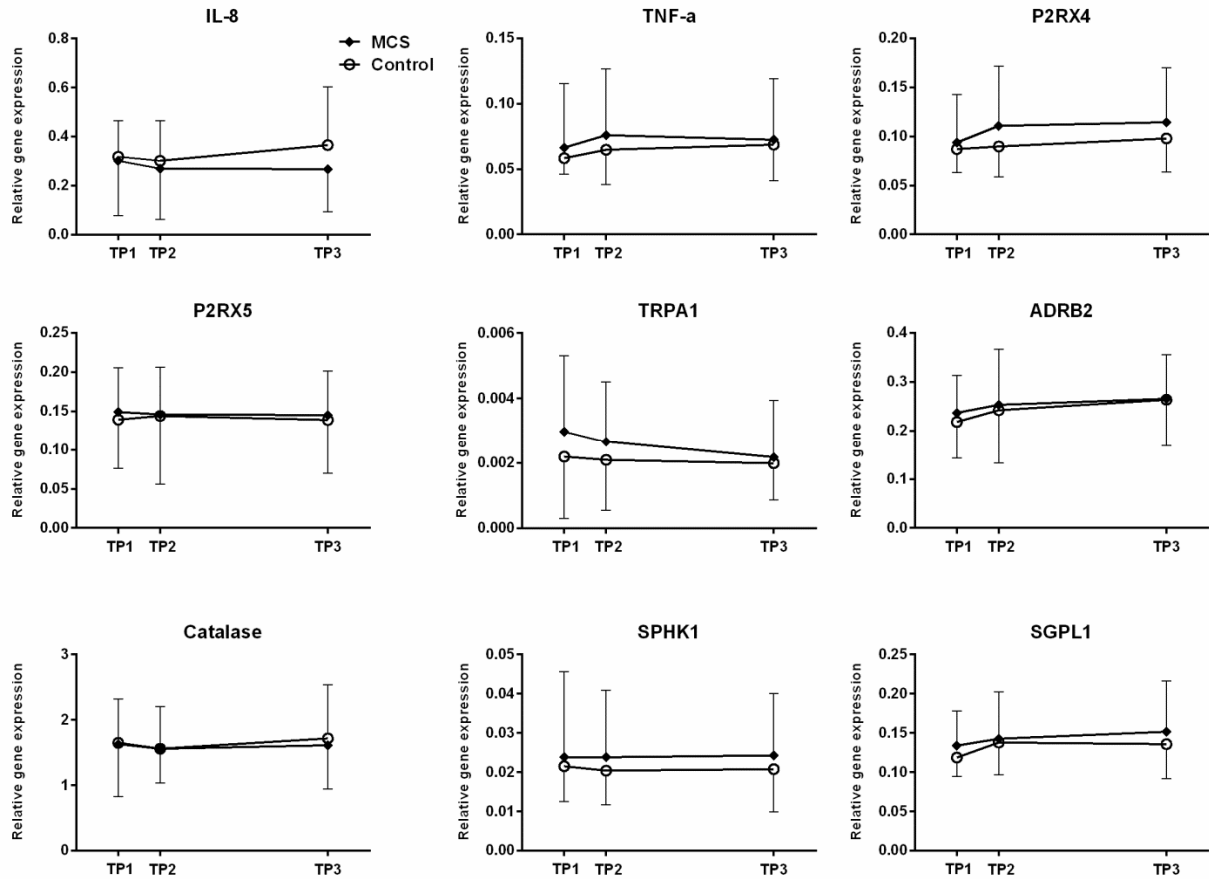

Relative gene expression levels before and upon *n*-butanol exposure. Data are shown as mean levels with SD of IL-8, TNF $\alpha$ , ADRB2, P2RX4, P2RX5, Catalase, TRPA1, SPHK1 and SGPL1 quantified in buffy coat samples from the MCS subjects and control. Data is presented at each of the three time points (TP) of sampling; at three time points (TP); within 30 minutes prior to the exposure (TP1), within 15 minutes post exposure (TP2) and 4 hours after the exposure session had been terminated (TP3).
