# Supplementary material
Source: HighWire-hosted journal article supplement (https://bmjopen.bmj.com/content/7/2/e013879)
Supplement: inline-supplementary-material-3 [file inline-supplementary-material-3.pdf]

## Supplementary File 3

### Principal component analysis based on AUC values

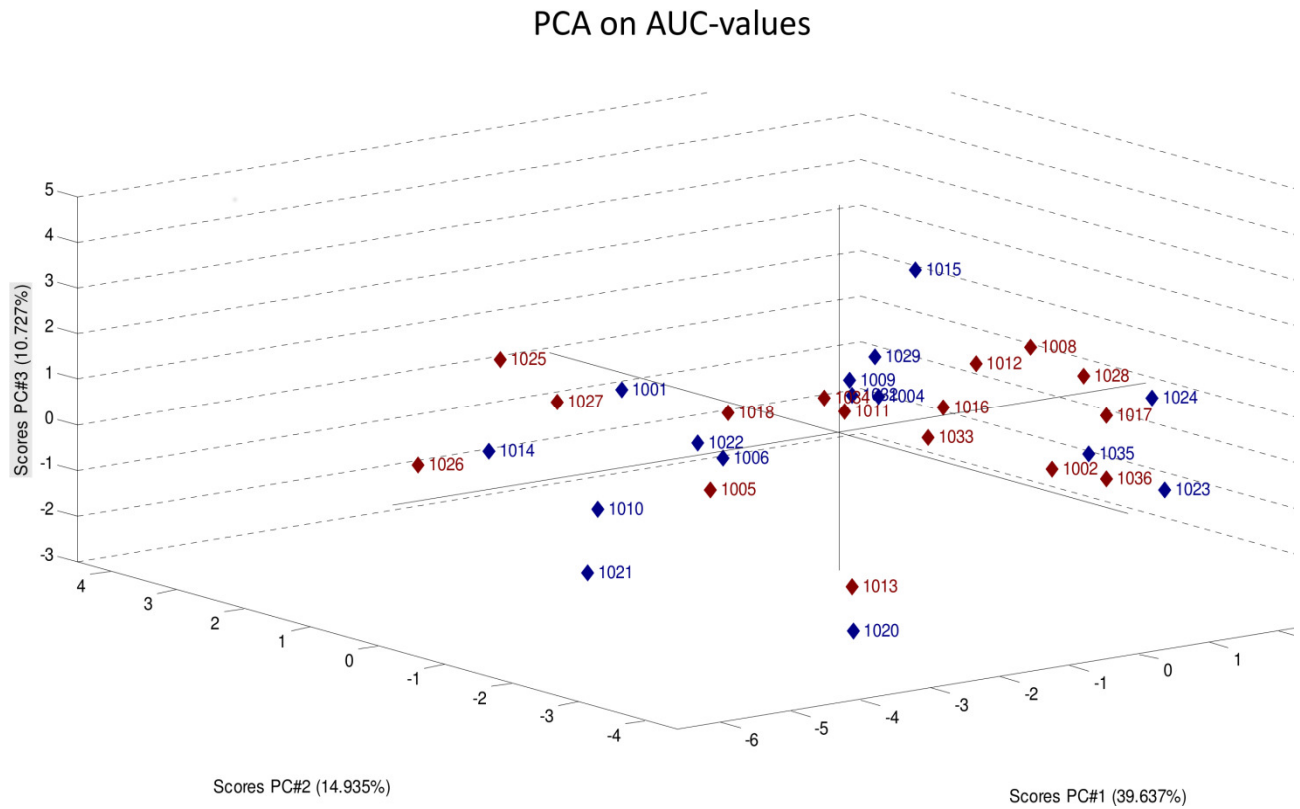

Score plot of principal component (PC) analysis based on AUC values for gene expression of all participants with exception of one participant of the MCS group being excluded as a visual numerical outlier. Participants of the MCS group are in blue colors and controls in red.
